# Supplementary material
Source: publisher figshare collection journal article supplement (https://tandf.figshare.com/ndownloader/files/14820338)
Supplement: Supplementary file 1 [file 14820338]

# Appendix 1: Experimental items contained in Exp. 1.

| 1 | Passive | The guitarist was rejected by the attractive and talented singer in the concert hall next to the Irish pub. |
| --- | --- | --- |
|  | Progressive | The guitarist was rejecting the attractive and talented singer in the concert hall next to the Irish pub. |
|  | Active | The guitarist rejected the attractive and talented singer in the concert hall next to the Irish pub. |
| 2 | Passive | The caterer was paid by the creative and competent chef in the newly refurbished kitchen opposite the big cold-store. |
|  | Progressive | The caterer was paying the creative and competent chef in the newly refurbished kitchen opposite the big cold-store. |
|  | Active | The caterer paid the creative and competent chef in the newly refurbished kitchen opposite the big cold-store. |
| 3 | Passive | The apprentice was injured by the naïve and clumsy electrician in the darkened room adjacent to the power line. |
|  | Progressive | The apprentice was injuring the naïve and clumsy electrician in the darkened room adjacent to the power line. |
|  | Active | The apprentice injured the naïve and clumsy electrician in the darkened room adjacent to the power line. |
| 4 | Passive | The detective was harassed by the loud and hostile witness in the front lobby next to the glass lift. |
|  | Progressive | The detective was harassing the loud and hostile witness in the front lobby next to the glass lift. |
|  | Active | The detective harassed the loud and hostile witness in the front lobby next to the glass lift. |
| 5 | Passive | The producer was sued by the untalented and pretentious artist in the legal offices next to the cinema studios. |
|  | Progressive | The producer was suing the untalented and pretentious artist in the legal offices next to the cinema studios. |
|  | Active | The producer sued the untalented and pretentious artist in the legal offices next to the cinema studios. |
| 6 | Passive | The chef was stabbed by the aggressive and insubordinate waiter in the restaurant kitchen next to the hotel foyer. |
|  | Progressive | The chef was stabbing the aggressive and insubordinate waiter in the restaurant kitchen next to the hotel foyer. |
|  | Active | The chef stabbed the aggressive and insubordinate waiter in the restaurant kitchen next to the hotel foyer. |
| 7 | Passive | The general was abandoned by the deceptive and cowardly soldier in the vast forest adjacent to the military campsite. |
|  | Progressive | The general was abandoning the deceptive and cowardly soldier in the vast forest adjacent to the military campsite. |
|  | Active | The general abandoned the deceptive and cowardly soldier in the vast forest adjacent to the military campsite. |
| 8 | Passive | The politician was injured by the jealous and resentful waitress in the large bathroom next to the crowded press-room. |
|  | Progressive | The politician was injuring the jealous and resentful waitress in the large bathroom next to the crowded press-room. |
|  | Active | The politician injured the jealous and resentful waitress in the large bathroom next to the crowded press-room. |
| 9 | Passive | The lawyer was corrupted by the nervous and dishonest judge in the famous cocktail bar opposite the County courthouse. |
|  | Progressive | The lawyer was corrupting the nervous and dishonest judge in the famous cocktail bar opposite the County courthouse. |
|  | Active | The lawyer corrupted the nervous and dishonest judge in the famous cocktail bar opposite the County courthouse. |
| 10 | Passive | The student was harassed by the misogynistic and racist professor in the science laboratory next to the language department. |
|  | Progressive | The student was harassing the misogynistic and racist professor in the science laboratory next to the language department. |
|  | Active | The student harassed the misogynistic and racist professor in the science laboratory next to the language department. |
| 11 | Passive | The salesman was hired by the experienced and competent associate in the colourful hotel lounge opposite the guest library. |
|  | Progressive | The salesman was hiring the experienced and competent associate in the colourful hotel lounge opposite the guest library. |
|  | Active | The salesman hired the experienced and competent associate in the colourful hotel lounge opposite the guest library. |
| 12 | Passive | The director was rejected by the charming and charismatic actress in the café on the corner near the theatre. |
|  | Progressive | The director was rejecting the charming and charismatic actress in the café on the corner near the theatre. |
|  | Active | The director rejected the charming and charismatic actress in the café on the corner near the theatre. |
| 13 | Passive | The pilot was stabbed by the bald and overweight steward in the luxury airport lounge opposite the unisex toilets. |
|  | Progressive | The pilot was stabbing the bald and overweight steward in the luxury airport lounge opposite the unisex toilets. |
|  | Active | The pilot stabbed the bald and overweight steward in the luxury airport lounge opposite the unisex toilets. |
| 14 | Passive | The sculptor was mugged by the strange and temperamental photographer in the art gallery next to the book shop. |
|  | Progressive | The sculptor was mugging the strange and temperamental photographer in the art gallery next to the book shop. |
|  | Active | The sculptor mugged the strange and temperamental photographer in the art gallery next to the book shop. |
| 15 | Passive | The protester was attacked by the aggressive and stocky policeman in the crowded street near the old town centre. |
|  | Progressive | The protester was attacking the aggressive and stocky policeman in the crowded street near the old town centre. |
|  | Active | The protester attacked the aggressive and stocky policeman in the crowded street near the old town centre. |
| 16 | Passive | The nun was saved by the wise and respected teacher in the rose garden outside the old Catholic church. |
|  | Progressive | The nun was saving the wise and respected teacher in the rose garden outside the old Catholic church. |
|  | Active | The nun saved the wise and respected teacher in the rose garden outside the old Catholic church. |
| 17 | Passive | The nurse was seduced by the handsome and distinguished doctor in the cosy staff kitchen on the seventh floor. |
|  | Progressive | The nurse was seducing the handsome and distinguished doctor in the cosy staff kitchen on the seventh floor. |
|  | Active | The nurse seduced the handsome and distinguished doctor in the cosy staff kitchen on the seventh floor. |
| 18 | Passive | The scientist was rescued by the brave and reckless reporter in the chemical analysis laboratory near the great fire. |
|  | Progressive | The scientist was rescuing the brave and reckless reporter in the chemical analysis laboratory near the great fire. |
|  | Active | The scientist rescued the brave and reckless reporter in the chemical analysis laboratory near the great fire. |
| 19 | Passive | The waitress was seduced by the fascinating and flirtatious model in the Chinese restaurant opposite the multi-brand fashion showroom. |
|  | Progressive | The waitress was seducing the fascinating and flirtatious model in the Chinese restaurant opposite the multi-brand fashion showroom. |
|  | Active | The waitress seduced the fascinating and flirtatious model in the Chinese restaurant opposite the multi-brand fashion showroom. |
| 20 | Passive | The babysitter was paid by the mature and trustworthy pharmacist in the office at the back of the shop. |
|  | Progressive | The babysitter was paying the mature and trustworthy pharmacist in the office at the back of the shop. |
|  | Active | The babysitter paid the mature and trustworthy pharmacist in the office at the back of the shop. |
| 21 | Passive | The industrialist was sued by the angry and resentful client in the legal services office opposite the company building. |
|  | Progressive | The industrialist was suing the angry and resentful client in the legal services office opposite the company building. |
|  | Active | The industrialist sued the angry and resentful client in the legal services office opposite the company building. |
| 22 | Passive | The mechanic was fired by the ill-mannered and annoying auto-electrician in the spacious garage next to the congested highway. |
|  | Progressive | The mechanic was firing the ill-mannered and annoying auto-electrician in the spacious garage next to the congested highway. |
|  | Active | The mechanic fired the ill-mannered and annoying auto-electrician in the spacious garage next to the congested highway. |
| 23 | Passive | The suspect was shocked by the astute and perceptive detective in the dark interrogation room inside the police station. |
|  | Progressive | The suspect was shocking the astute and perceptive detective in the dark interrogation room inside the police station. |
|  | Active | The suspect shocked the astute and perceptive detective in the dark interrogation room inside the police station. |
| 24 | Passive | The salesgirl was pushed by the nervous and hysterical client in the shopping mall next to the tube station. |
|  | Progressive | The salesgirl was pushing the nervous and hysterical client in the shopping mall next to the tube station. |
|  | Active | The salesgirl pushed the nervous and hysterical client in the shopping mall next to the tube station. |
| 25 | Passive | The child was slapped by the young and skinny babysitter in the colourful nursery inside the big country-style house. |
|  | Progressive | The child was slapping the young and skinny babysitter in the colourful nursery inside the big country-style house. |
|  | Active | The child slapped the young and skinny babysitter in the colourful nursery inside the big country-style house. |
| 26 | Passive | The soldier was kidnapped by the armed and dangerous rebel in the dark cave next to the combat zone. |
|  | Progressive | The soldier was kidnapping the armed and dangerous rebel in the dark cave next to the combat zone. |
|  | Active | The soldier kidnapped the armed and dangerous rebel in the dark cave next to the combat zone. |
| 27 | Passive | The student was rescued by the aged and revered tutor near the collapsed basement inside the old humanities library. |
|  | Progressive | The student was rescuing the aged and revered tutor near the collapsed basement inside the old humanities library. |
|  | Active | The student rescued the aged and revered tutor near the collapsed basement inside the old humanities library. |
| 28 | Passive | The dancer was slapped by the oppressive and abusive choreographer in the messy dressing room of the renowned theatre. |
|  | Progressive | The dancer was slapping the oppressive and abusive choreographer in the messy dressing room of the renowned theatre. |
|  | Active | The dancer slapped the oppressive and abusive choreographer in the messy dressing room of the renowned theatre. |
| 29 | Passive | The investigator was bribed by the unpleasant and bald bartender in the crowded pub next to the crime scene. |
|  | Progressive | The investigator was bribing the unpleasant and bald bartender in the crowded pub next to the crime scene. |
|  | Active | The investigator bribed the unpleasant and bald bartender in the crowded pub next to the crime scene. |
| 30 | Passive | The climber was abandoned by the unwise and incompetent guide in the disused shelter on the rugged mountain top. |
|  | Progressive | The climber was abandoning the unwise and incompetent guide in the disused shelter on the rugged mountain top. |
|  | Active | The climber abandoned the unwise and incompetent guide in the disused shelter on the rugged mountain top. |

# Appendix 2: Filler items contained in Exp. 1, 2, 3&4.

| 1 | The teacher took the car instead of the express train due to the previously announced public transport strike. |
| --- | --- |
| 2 | The researcher presented his most recent work to the commission and obtained very positive comments regarding the experimental design. |
| 3 | The brilliant student easily solved complicated logarithmic equations during the math lecture but the distracted student did not. |
| 4 | The judge asked for an explanation of the events and the accused answered in a complete and sincere way. |
| 5 | The artist created a controversial representation of contemporary society and exhibited it in the most popular square in the city. |
| 6 | The producer announced the release of the new thriller based on the best-selling novel by the famous Chinese author. |
| 7 | The dancer practised intensely for several days in the ball room and participated in the International Street Dancers Competition. |
| 8 | The police reported several details regarding the severe accident on the high street near the crossroads and the media did too. |
| 9 | The art student participated in a sculpture class and exhibited her creations in a collective show at the university. |
| 10 | The mathematician solved the difficult problem and obtained the most famous and prestigious prize in his discipline. |
| 11 | The politician announced his candidacy for the presidential election and answered several questions from the media at the conference. |
| 12 | The dangerous rebels attacked the school in the isolated area and all the students screamed in terror. |
| 13 | The beautiful princess married her young and handsome chauffeur and shocked the royal family and the press. |
| 14 | The brave and strong lifeguard rapidly swam towards the boat on fire and saved the old couple. |
| 15 | The big law firm began to fire employees in several departments due to an irreversible financial crisis. |
| 16 | The girl was kissed by her loving and handsome fiancé under a cherry tree in the scented garden. |
| 17 | The violinist was scolded by her tutor due to her lack of discipline during the intensive training for the concert. |
| 18 | The driver was scolded by his supervisor due to his consistently long delays in delivering their products. |
| 19 | The lady was admired by several young and bold soldiers along the path covered by yellow leaves in the park. |
| 20 | The princess was kissed by the handsome and valiant prince in the magical wood near the royal palace. |
| 21 | The debutante was presented to the distinguished and respectable members of the society during a thrilling event at the ballroom. |
| 22 | The swimmer was admired by her numerous fans for her excellent performance in the pool during the Olympic Games. |
| 23 | The child was taken to hospital by his apprehensive and worried mother due to his severe and long-lasting symptoms. |
| 24 | The ambassador was nominated Honorary Councillor by the president due to her important contribution to the cooperation between European nations. |
| 25 | The professor was unanimously elected as chairman of the Archaeology department by the board composed of distinguished scholars from important institutions. |
| 26 | The scientist was nominated for the Nobel Prize by the Norwegian committee for his ground-breaking studies on neuronal activity in rats. |
| 27 | The cheerleader was elected as Prom Queen by her schoolmates thanks to her stunning beauty and well-known kindness. |
| 28 | The heir to the rich and powerful family was kidnapped by criminals after school on Tuesday afternoon. |
| 29 | The rich and elegant old lady was mugged outside the jewellery store after a very expensive purchase. |
| 30 | The policeman was corrupted by the defence attorney during the investigation on the bloody and dreadful murder. |
| 31 | The policeman did not report the big fight between the rude and hostile neighbours in the quiet and tidy street. |
| 32 | The Japanese sculptor could not create a universally admired reproduction of the famous statue for the Ancient Culture Exhibition. |
| 33 | The teacher did not ask the lazy student for his attention during the lecture on morality in Ancient Egypt. |
| 34 | The politician did not practise her speech on the amendment of a law on public debate because of a cold. |
| 35 | The little girl did not play with her brother in the colourful playground next to their weedy garden. |
| 36 | The German striker could not score against the famous Italian football team of Milan for the entirety of his unsuccessful career. |
| 37 | The lady could not offer a well-paid job to the young unemployed woman at the shelter near the tube station. |
| 38 | The lawyer could not offer a good defence to his clients due to his lack of preparation for the trial. |
| 39 | The school director did not expel the student for his strange behaviour towards his classmates during the school trip. |
| 40 | The moderator did not expel the representative for his unorthodox response to a member of the opposing party. |
| 41 | The director did not fairly assign roles to the actors for the new Broadway production of the world-renowned play. |
| 42 | The butler did not assign tasks to the maids and waiters of the house in time to adequately prepare for the dinner party. |
| 43 | The senior manager could not hire new employees despite the urgent need of extra help for the upcoming event. |
| 44 | The young waitress could not push the heavy trolley with the pile of dirty plates toward the kitchen. |
| 45 | The district attorney did not bribe the juror during the controversial trial against the pharmaceutical company last year. |
| 46 | While the boy and the girl hugged the father appeared at the door of the tool shed next to the bushes. |
| 47 | While the quick and expert burglar and his accomplice fought the police appeared in front of the National bank. |
| 48 | While the neurologist of the highly ranked hospital in Chicago and the patient met the wife waited in the room. |
| 49 | While the student of the famous university in Florida and his parents saluted the chauffeur waited outside. |
| 50 | While the father and the mother cuddled the little girl played the piano in the living room during the Christmas party. |
| 51 | While the famous cellist and the singer dated the director gave an extraordinary performance at the Royal Albert Hall. |
| 52 | While the officer and the superintendent debated the new rule about safety showed the weak points in the chain of command. |
| 53 | While the rock guitarist and the agent hugged the sound technician loudly screamed in the soundproofed studio near the elevator. |
| 54 | While the recovering patient and the doctor saluted the nurse gave a leaflet to each participant in the staff meeting. |
| 55 | While the football player and the therapist dated the Dutch striker scored the final goal for the victory. |
| 56 | While the caring coach and the sweet lifeguard cuddled the little girl swam for the first time without armbands. |
| 57 | While the researcher and the director of the laboratory debated the machine showed a significant increase in the level of toxicity in the substance. |
| 58 | While the brilliant student and the history professor met the dean of the department organised the next staff meeting. |
| 59 | While the soldier and the captain fought the lieutenant organised the retreat from the line of fire behind the fortress. |
| 60 | While the foreign ambassador and the princess married the president began his speech about the reform of the National Security Agency. |

# Appendix 3: Implausible items created for the pre-norming plausibility task.

| 1 | The celebrities interviewed the journalist and received very positive reviews from the readers of the magazine it was published in. |
| --- | --- |
| 2 | The illiterate painter spent two years in his chalet in the Alps and wrote out the material for his autobiography. |
| 3 | The patient discovered the past traumas the therapist had endured during his childhood at the beginning of treatment in the clinic. |
| 4 | The religious nun went to the striptease at the famous night cub in London with her enthusiastic sisters and the archbishop. |
| 5 | The villager haunted the ghost of the man who had previously lived in his home on the top of the hill. |
| 6 | The man scored twelve goals in the football match he refereed as a favour to his older brother. |
| 7 | The Roman Catholic priest married his hard working wife on a rainy day in Portofino during the spring. |
| 8 | The actor shaved the barber’s hair in preparation for his new role in the latest action film shot in Hollywood. |
| 9 | Santa Claus gave coal to all the children on the nice list and presents to those on the naughty list. |
| 10 | The audience entertained the circus performers travelling the country with their new show in the circus tent. |
| 11 | The law abiding police man was arrested by the criminal last Saturday on the town's busy high street. |
| 12 | The friar was discovered seducing the temptress by the priest in the old church with the cherry tree at its rear. |
| 13 | The dogs were herded by the sheep while the shepherd tried to move the flock away from the ferocious wolf. |
| 14 | The dragon was eaten by the prince trying to win the hand of the beautiful princess from the neighbouring kingdom. |
| 15 | The irate train conductor was removed from the train by the passenger on her way to see the West end show. |
| 16 | The paramedic was saved by the severely injured woman after the fire in her house started by her cat. |
| 17 | The scientists were experimented on by the mice in the immensely high tech laboratory in the university. |
| 18 | The children who were fed bread by the ducks lived in a quiet village in the north of England. |
| 19 | The jeweller who had stolen many diamond necklaces from the burglar usually went on holiday to his time share in Spain. |
| 20 | The cruel master who had escaped from his slave ran through the streets of ancient Rome towards the forum. |
| 21 | The demon who expelled the exorcist from the possessed room with his sliver cross knew the residents many sordid secrets. |
| 22 | The little boy who scared the clown at his birthday party received a remote controlled race car as a present. |
| 23 | The refugees who helped the philanthropist were happy to know that they were now citizens in a new country. |
| 24 | The child who rescued the lifeguard at the local beach had once spotted a dolphin in the water. |
| 25 | The waitress who the customer served always collected her tips from the tables at the end of her shift. |
| 26 | The tabby cat who the little mouse hunted lived in the house with a swing in its front garden. |
| 27 | The millionaire who the sweet old housekeeper hired to clean and tidy had great references from his previous employers |
| 28 | The dog who the cat chased was a husky who had once pulled sleighs through the snow for famous adventurers. |
| 29 | The rabbit who the little girl fed steak lived in a large yellow hutch in the garden. |
| 30 | The lord who served the chef his dinner only frequented the House of Lords to vote on big issues. |

# Appendix 4: Frequency of surface form of eventive verbs contained in Exp. 1.

| Verb | Frequency of the passive form (%) | Verb | Frequency of the passive form (%) | Verb | Frequency of the passive form (%) |
| --- | --- | --- | --- | --- | --- |
| abandon | 35 | hire | 25 | rescue | 32 |
| attack | 27 | injure | 77 | save | 24 |
| bribe | 20 | kidnap | 48 | seduce | 32 |
| corrupt | 38 | mug | 62 | shock | 57 |
| fire | 57 | pay | 19 | slap | 14 |
| harass | 41 | push | 14 | stab | 48 |
|  |  | reject | 27 | sue | 20 |

# Appendix 5: Comprehension questions contained in Exp. 1.

| 1 | Active | Did the musician play the guitar? |
| --- | --- | --- |
|  | Passive | Did the musician play the guitar? |
| 2 | Active | Did the caterer pay the chef? |
|  | Passive | Did the chef pay the caterer? |
| 3 | Active | Did the electrician injure the apprentice? |
|  | Passive | Did the apprentice injure the electrician? |
| 4 | Active | Did the detective harass the witness? |
|  | Passive | Did the witness harass the detective? |
| 5 | Active | Did the producer sue the artist? |
|  | Passive | Did the artist sue the producer? |
| 6 | Active | Did the chef work in a café? |
|  | Passive | Did the chef work in a café? |
| 7 | Active | Did the soldier abandon the general? |
|  | Passive | Did the general abandon the soldier? |
| 8 | Active | Did the waitress injure the politician? |
|  | Passive | Did the politician injure the waitress? |
| 9 | Active | Did the lawyer commit a felony? |
|  | Passive | Did the judge commit a felony? |
| 10 | Active | Did the student mistreat the professor? |
|  | Passive | Did the professor mistreat the student? |
| 11 | Active | Did the hotel designer like colours? |
|  | Passive | Did the hotel designer like colours? |
| 12 | Active | Did the director reject the actress? |
|  | Passive | Did the actress reject the director? |
| 13 | Active | Did the pilot stab the steward? |
|  | Passive | Did the steward stab the pilot? |
| 14 | Active | Did the photographer mug the sculptor? |
|  | Passive | Did the sculptor mug the photographer? |
| 15 | Active | Did the policeman attack the protester? |
|  | Passive | Did the protester attack the policeman? |
| 16 | Active | Did the nuns cultivate tulips in the church garden? |
|  | Passive | Did the nuns cultivate tulips in the church garden? |
| 17 | Active | Was the kitchen designed to be comfortable? |
|  | Passive | Was the kitchen designed to be comfortable? |
| 18 | Active | Did the scientist rescue the reporter? |
|  | Passive | Did the reporter rescue the scientist? |
| 19 | Active | Did the waitress work in a Chinese restaurant? |
|  | Passive | Did the waitress work in a Chinese restaurant? |
| 20 | Active | Did the babysitter purchase products from the shop? |
|  | Passive | Did the pharmacist hire the babysitter? |
| 21 | Active | Did the client sue the industrialist? |
|  | Passive | Did the industrialist sue the client? |
| 22 | Active | Did the auto-electrician fire the mechanic? |
|  | Passive | Did the mechanic fire the auto-electrician? |
| 23 | Active | Did the detective shock the suspect? |
|  | Passive | Did the suspect shock the detective? |
| 24 | Active | Did the salesgirl work in a shopping mall? |
|  | Passive | Did the salesgirl work in a shopping mall? |
| 25 | Active | Did the babysitter slap the child? |
|  | Passive | Did the child slap the babysitter? |
| 26 | Active | Was the rebel hidden in a ruined shed? |
|  | Passive | Was the soldier hidden in a ruined shed? |
| 27 | Active | Was the basement made of resistant materials? |
|  | Passive | Was the basement made of resistant materials? |
| 28 | Active | Did the dancer approve the attitude of the choreographer? |
|  | Passive | Did the choreographer approve the attitude of the dancer? |
| 29 | Active | Was the bartender known for his thick hair? |
|  | Passive | Was the bartender known for his thick hair? |
| 30 | Active | Did the climber abandon the guide? |
|  | Passive | Did the guide abandon the climber? |

# Appendix 6: Experimental items contained in Exp. 2.

| 1 | Passive | The guitarist was cherished by the attractive and talented singer for keeping the band focused through the whole tour. |
| --- | --- | --- |
|  | Active | The guitarist cherished the attractive and talented singer for keeping the band focused through the whole tour. |
| 2 | Passive | The caterer was admired by the creative and competent chef for being very professional at the French embassy's dinner. |
|  | Active | The caterer admired the creative and competent chef for being very professional at the French embassy's dinner. |
| 3 | Passive | The apprentice was resented by the naïve and clumsy electrician for causing severe damage to the new electrical system. |
|  | Active | The apprentice resented the naïve and clumsy electrician for causing severe damage to the new electrical system. |
| 4 | Passive | The detective was hated by the loud and hostile witness for having a violent outburst at the crime scene. |
|  | Active | The detective hated the loud and hostile witness for having a violent outburst at the crime scene. |
| 5 | Passive | The producer was detested by the untalented and pretentious artist for showing a lack of commitment to the movie. |
|  | Active | The producer detested the untalented and pretentious artist for showing a lack of commitment to the movie. |
| 6 | Passive | The chef was hated by the aggressive and insubordinate waiter for having an attitude of superiority in the kitchen. |
|  | Active | The chef hated the aggressive and insubordinate waiter for having an attitude of superiority in the kitchen. |
| 7 | Passive | The spy was feared by the deceptive and cowardly soldier for behaving strangely during the most recent military engagement. |
|  | Active | The spy feared the deceptive and cowardly soldier for behaving strangely during the most recent military engagement. |
| 8 | Passive | The politician was loved by the jealous and insecure waitress for buying a beautiful present for their recent anniversary. |
|  | Active | The politician loved the jealous and insecure waitress for buying a beautiful present for their recent anniversary. |
| 9 | Passive | The lawyer was respected by the honest and wise judge for providing the poor suspect with excellent legal representation. |
|  | Active | The lawyer respected the honest and wise judge for providing the poor suspect with excellent legal representation. |
| 10 | Passive | The student was cherished by the young and friendly professor for showing great enthusiasm during each of the lectures. |
|  | Active | The student cherished the young and friendly professor for showing great enthusiasm during each of the lectures. |
| 11 | Passive | The broker was envied by the experienced and competent associate for proposing a brilliant idea to attract new customers. |
|  | Active | The broker envied the experienced and competent associate for proposing a brilliant idea to attract new customers. |
| 12 | Passive | The director was adored by the charming and charismatic actress for receiving very good reviews of the first performance. |
|  | Active | The director adored the charming and charismatic actress for receiving very good reviews of the first performance. |
| 13 | Passive | The pilot was resented by the bald and overweight steward for making a bad joke about the scared passenger. |
|  | Active | The pilot resented the bald and overweight steward for making a bad joke about the scared passenger. |
| 14 | Passive | The sculptor was admired by the strange and temperamental photographer for achieving great success in the recent museum exhibition. |
|  | Active | The sculptor admired the strange and temperamental photographer for achieving great success in the recent museum exhibition. |
| 15 | Passive | The protester was detested by the aggressive and stocky policeman for committing an extremely violent act during the demonstration. |
|  | Active | The protester detested the aggressive and stocky policeman for committing an extremely violent act during the demonstration. |
| 16 | Passive | The nun was valued by the wise and respected teacher for working to improve the conditions of underprivileged children. |
|  | Active | The nun valued the wise and respected teacher for working to improve the conditions of underprivileged children. |
| 17 | Passive | The nurse was valued by the handsome and distinguished doctor for working tirelessly during the eight hour surgical procedure. |
|  | Active | The nurse valued the handsome and distinguished doctor for working tirelessly during the eight hour surgical procedure. |
| 18 | Passive | The scientist was despised by the brave and reckless reporter for demonstrating a lack of respect for animals' rights. |
|  | Active | The scientist despised the brave and reckless reporter for demonstrating a lack of respect for animals' rights. |
| 19 | Passive | The waitress was loved by the fascinating and flirtatious model for saving the little cat trapped on the tree. |
|  | Active | The waitress loved the fascinating and flirtatious model for saving the little cat trapped on the tree. |
| 20 | Passive | The babysitter was trusted by the mature and reliable pharmacist for having promptly intervened during the child's crying fit. |
|  | Active | The babysitter trusted the mature and reliable pharmacist for having promptly intervened during the child's crying fit. |
| 21 | Passive | The industrialist was despised by the angry and resentful client for refusing sternly to settle the potentially damaging lawsuit. |
|  | Active | The industrialist despised the angry and resentful client for refusing sternly to settle the potentially damaging lawsuit. |
| 22 | Passive | The mechanic was trusted by the kind and naïve customer for having helped during the fire in the neighbourhood. |
|  | Active | The mechanic trusted the kind and naïve customer for having helped during the fire in the neighbourhood. |
| 23 | Passive | The detective was feared by the impulsive and panicky suspect for having behaved very frighteningly during the last interrogation. |
|  | Active | The detective feared the impulsive and panicky suspect for having behaved very frighteningly during the last interrogation. |
| 24 | Passive | The salesgirl was pitied by the nervous and overworked businesswoman for reacting hysterically in the famous haute couture boutique. |
|  | Active | The salesgirl pitied the nervous and overworked businesswoman for reacting hysterically in the famous haute couture boutique. |
| 25 | Passive | The child was adored by the young and skinny babysitter for being very creative and imaginative in their games. |
|  | Active | The child adored the young and skinny babysitter for being very creative and imaginative in their games. |
| 26 | Passive | The soldier was loathed by the armed and dangerous rebel for imprisoning women and children in the recent raids. |
|  | Active | The soldier loathed the armed and dangerous rebel for imprisoning women and children in the recent raids. |
| 27 | Passive | The student was respected by the aged and revered tutor for making interesting observations about the Ancient Ottoman Empire. |
|  | Active | The student respected the aged and revered tutor for making interesting observations about the Ancient Ottoman Empire. |
| 28 | Passive | The dancer was loathed by the oppressive and abusive choreographer for performing very badly during the show on Friday. |
|  | Active | The dancer loathed the oppressive and abusive choreographer for performing very badly during the show on Friday. |
| 29 | Passive | The investigator was pitied by the unpleasant and bald bartender for making very racist jokes at the local pub. |
|  | Active | The investigator pitied the unpleasant and bald bartender for making very racist jokes at the local pub. |
| 30 | Passive | The guide was envied by the handsome and athletic climber for reaching the top of the mountain without resting. |
|  | Active | The guide envied the handsome and athletic climber for reaching the top of the mountain without resting. |

# Appendix 7: Comprehension questions contained in Exp. 2.

| 1 | Active | Did the musician play the guitar? |
| --- | --- | --- |
|  | Passive | Did the musician play the guitar? |
| 2 | Active | Did the caterer admire the chef? |
|  | Passive | Did the chef admire the caterer? |
| 3 | Active | Did the electrician resent the apprentice? |
|  | Passive | Did the apprentice resent the electrician? |
| 4 | Active | Did the detective hate the witness? |
|  | Passive | Did the witness hate the detective? |
| 5 | Active | Did the producer detest the artist? |
|  | Passive | Did the artist detest the producer? |
| 6 | Active | Was the waiter humble and obedient? |
|  | Passive | Was the waiter humble and obedient? |
| 7 | Active | Did the soldier fear the spy? |
|  | Passive | Did the spy fear the soldier? |
| 8 | Active | Did the anniversary occur several months before? |
|  | Passive | Did the anniversary occur several months before? |
| 9 | Active | Did the suspect receive legal representation? |
|  | Passive | Did the suspect receive legal representation? |
| 10 | Active | Did the student cherish the professor? |
|  | Passive | Did the professor cherish the student? |
| 11 | Active | Did the associate have a lot of experience? |
|  | Passive | Did the associate have a lot of experience? |
| 12 | Active | Did the director adore the actress? |
|  | Passive | Did the actress adore the director? |
| 13 | Active | Did the pilot resent the steward? |
|  | Passive | Did the steward resent the pilot? |
| 14 | Active | Did the photographer admire the sculptor? |
|  | Passive | Did the sculptor admire the photographer? |
| 15 | Active | Did the policeman detest the protester? |
|  | Passive | Did the protester detest the policeman? |
| 16 | Active | Did the teacher value the nun? |
|  | Passive | Did the nun value the teacher? |
| 17 | Active | Was the surgical procedure long? |
|  | Passive | Was the surgical procedure long? |
| 18 | Active | Did the scientist despise the reporter? |
|  | Passive | Did the reporter despise the scientist? |
| 19 | Active | Was the cat on a tree? |
|  | Passive | Was the cat on a tree? |
| 20 | Active | Did the babysitter trust the pharmacist? |
|  | Passive | Did the pharmacist trust the babysitter? |
| 21 | Active | Did the client despise the industrialist? |
|  | Passive | Did the industrialist despise the client? |
| 22 | Active | Did the customer trust the mechanic? |
|  | Passive | Did the customer trust the mechanic? |
| 23 | Active | Did the detective fear the suspect? |
|  | Passive | Did the suspect fear the detective? |
| 24 | Active | Did the salesgirl work in a famous boutique? |
|  | Passive | Did the salesgirl work in a famous boutique? |
| 25 | Active | Did the babysitter adore the child? |
|  | Passive | Did the child adore the babysitter? |
| 26 | Active | Did the rebel imprison old men? |
|  | Passive | Did the soldier imprison old men? |
| 27 | Active | Was the tutor young and unexperienced? |
|  | Passive | Was the tutor young and unexperienced? |
| 28 | Active | Did the dancer appreciate the work of the choreographer? |
|  | Passive | Did the choreographer appreciate the performance of the dancer? |
| 29 | Active | Was the bartender known for his thick hair? |
|  | Passive | Was the bartender known for his thick hair? |
| 30 | Active | Did the climber envy the guide? |
|  | Passive | Did the guide envy the climber? |

# Appendix 8: Frequency of surface form of stative verbs contained in Exp. 2.

| Verb | Frequency of the passive form (%) | Verb | Frequency of the passive form (%) | Verb | Frequency of the passive form (%) |
| --- | --- | --- | --- | --- | --- |
| admire | 25 | envy | 63 | pity | 26 |
| adore | 11 | fear | 14 | resent | 19 |
| cherish | 45 | hate | 5 | respect | 63 |
| despise | 35 | loath | 13 | trust | 49 |
| detest | 14 | love | 6 | value | 69 |

# Appendix 9: Experimental items contained in Exp. 3 & 4.

| | 1 | Eventive | Passive | The guitarist was rejected by the attractive and talented singer in the concert hall next to the Irish pub. | | --- | --- | --- | --- | |  | Eventive | Active | The guitarist rejected the attractive and talented singer in the concert hall next to the Irish pub. | |  | Stative | Passive | The guitarist was cherished by the attractive and talented singer for keeping the band focused through the whole tour. | |  | Stative | Active | The guitarist cherished the attractive and talented singer for keeping the band focused through the whole tour. | | 2 | Eventive | Passive | The caterer was paid by the creative and competent chef in the newly refurbished kitchen opposite the big cold-store. | |  | Eventive | Active | The caterer paid the creative and competent chef in the newly refurbished kitchen opposite the big cold-store. | |  | Stative | Passive | The caterer was admired by the creative and competent chef for being very professional at the French embassy's dinner. | |  | Stative | Active | The caterer admired the creative and competent chef for being very professional at the French embassy's dinner. | | 3 | Eventive | Passive | The apprentice was injured by the naïve and clumsy electrician in the darkened room adjacent to the power line. | |  | Eventive | Active | The apprentice injured the naïve and clumsy electrician in the darkened room adjacent to the power line. | |  | Stative | Passive | The apprentice was resented by the naïve and clumsy electrician for causing severe damage to the new electrical system. | |  | Stative | Active | The apprentice resented the naïve and clumsy electrician for causing severe damage to the new electrical system. | | 4 | Eventive | Passive | The detective was harassed by the loud and hostile witness in the front lobby next to the glass lift. | |  | Eventive | Active | The detective harassed the loud and hostile witness in the front lobby next to the glass lift. | |  | Stative | Passive | The detective was hated by the loud and hostile witness for having a violent outburst at the crime scene. | |  | Stative | Active | The detective hated the loud and hostile witness for having a violent outburst at the crime scene. | | 5 | Eventive | Passive | The producer was sued by the untalented and pretentious artist in the legal offices next to the cinema studios. | |  | Eventive | Active | The producer sued the untalented and pretentious artist in the legal offices next to the cinema studios. | |  | Stative | Passive | The producer was detested by the untalented and pretentious artist for showing a lack of commitment to the movie. | |  | Stative | Active | The producer detested the untalented and pretentious artist for showing a lack of commitment to the movie. | | 6 | Eventive | Passive | The chef was stabbed by the aggressive and insubordinate waiter in the restaurant kitchen next to the hotel foyer. | |  | Eventive | Active | The chef stabbed the aggressive and insubordinate waiter in the restaurant kitchen next to the hotel foyer. | |  | Stative | Passive | The chef was hated by the aggressive and insubordinate waiter for having an attitude of superiority in the kitchen. | |  | Stative | Active | The chef hated the aggressive and insubordinate waiter for having an attitude of superiority in the kitchen. | | 7 | Eventive | Passive | The spy was abandoned by the deceptive and cowardly soldier in the vast forest adjacent to the military campsite. | |  | Eventive | Active | The spy abandoned the deceptive and cowardly soldier in the vast forest adjacent to the military campsite. | |  | Stative | Passive | The spy was feared by the deceptive and cowardly soldier for behaving strangely during the most recent military engagement. | |  | Stative | Active | The spy feared the deceptive and cowardly soldier for behaving strangely during the most recent military engagement. | | 8 | Eventive | Passive | The politician was injured by the jealous and insecure waitress in the large bathroom next to the crowded press-room. | |  | Eventive | Active | The politician injured the jealous and insecure waitress in the large bathroom next to the crowded press-room. | |  | Stative | Passive | The politician was loved by the jealous and insecure waitress for buying a beautiful present for their recent anniversary. | |  | Stative | Active | The politician loved the jealous and insecure waitress for buying a beautiful present for their recent anniversary. | | 9 | Eventive | Passive | The student was harassed by the young and inexperienced professor in the science laboratory next to the language department. | |  | Eventive | Active | The student harassed the young and inexperienced professor in the science laboratory next to the language department. | |  | Stative | Passive | The student was cherished by the young and inexperienced professor for showing great enthusiasm during each of the lectures. | |  | Stative | Active | The student cherished the young and inexperienced professor for showing great enthusiasm during each of the lectures. | | 10 | Eventive | Passive | The director was rejected by the charming and charismatic actress in the café on the corner near the theatre. | |  | Eventive | Active | The director rejected the charming and charismatic actress in the café on the corner near the theatre. | |  | Stative | Passive | The director was adored by the charming and charismatic actress for receiving very good reviews of the first performance. | |  | Stative | Active | The director adored the charming and charismatic actress for receiving very good reviews of the first performance. | | 11 | Eventive | Passive | The pilot was stabbed by the bald and overweight steward in the luxury airport lounge opposite the unisex toilets. | |  | Eventive | Active | The pilot stabbed the bald and overweight steward in the luxury airport lounge opposite the unisex toilets. | |  | Stative | Passive | The pilot was resented by the bald and overweight steward for making a bad joke about the scared passenger. | |  | Stative | Active | The pilot resented the bald and overweight steward for making a bad joke about the scared passenger. | | 12 | Eventive | Passive | The sculptor was abandoned by the famous and ecletic photographer in the art gallery next to the book shop. | |  | Eventive | Active | The sculptor abandoned the famous and ecletic photographer in the art gallery next to the book shop. | |  | Stative | Passive | The sculptor was admired by the famous and ecletic photographer for achieving great success in the recent museum exhibition. | |  | Stative | Active | The sculptor admired the famous and ecletic photographer for achieving great success in the recent museum exhibition. | | 13 | Eventive | Passive | The protester was attacked by the aggressive and stocky policeman in the crowded street near the old town centre. | |  | Eventive | Active | The protester attacked the aggressive and stocky policeman in the crowded street near the old town centre. | |  | Stative | Passive | The protester was detested by the aggressive and stocky policeman for committing an extremely violent act during the demonstration. | |  | Stative | Active | The protester detested the aggressive and stocky policeman for committing an extremely violent act during the demonstration. | | 14 | Eventive | Passive | The nun was saved by the wise and respected teacher in the rose garden outside the old Catholic church. | |  | Eventive | Active | The nun saved the wise and respected teacher in the rose garden outside the old Catholic church. | |  | Stative | Passive | The nun was valued by the wise and respected teacher for working to improve the conditions of underprivileged children. | |  | Stative | Active | The nun valued the wise and respected teacher for working to improve the conditions of underprivileged children. | | 15 | Eventive | Passive | The nurse was seduced by the handsome and distinguished doctor in the cosy staff kitchen on the seventh floor. | |  | Eventive | Active | The nurse seduced the handsome and distinguished doctor in the cosy staff kitchen on the seventh floor. | |  | Stative | Passive | The nurse was valued by the handsome and distinguished doctor for working tirelessly during the eight hour surgical procedure. | |  | Stative | Active | The nurse valued the handsome and distinguished doctor for working tirelessly during the eight hour surgical procedure. | | 16 | Eventive | Passive | The scientist was rescued by the brave and reckless reporter in the chemical analysis laboratory near the great fire. | |  | Eventive | Active | The scientist rescued the brave and reckless reporter in the chemical analysis laboratory near the great fire. | |  | Stative | Passive | The scientist was despised by the brave and reckless reporter for demonstrating a lack of respect for animals' rights. | |  | Stative | Active | The scientist despised the brave and reckless reporter for demonstrating a lack of respect for animals' rights. | | 17 | Eventive | Passive | The waitress was seduced by the fascinating and flirtatious model in the Chinese restaurant opposite the multi-brand fashion showroom. | |  | Eventive | Active | The waitress seduced the fascinating and flirtatious model in the Chinese restaurant opposite the multi-brand fashion showroom. | |  | Stative | Passive | The waitress was loved by the fascinating and flirtatious model for saving the little cat trapped on the tree. | |  | Stative | Active | The waitress loved the fascinating and flirtatious model for saving the little cat trapped on the tree. | | 18 | Eventive | Passive | The babysitter was paid by the mature and reliable pharmacist in the office at the back of the shop. | |  | Eventive | Active | The babysitter paid the mature and reliable pharmacist in the office at the back of the shop. | |  | Stative | Passive | The babysitter was trusted by the mature and reliable pharmacist for having promptly intervened during the child's crying fit. | |  | Stative | Active | The babysitter trusted the mature and reliable pharmacist for having promptly intervened during the child's crying fit. | | 19 | Eventive | Passive | The industrialist was sued by the angry and resentful client in the legal services office opposite the company building. | |  | Eventive | Active | The industrialist sued the angry and resentful client in the legal services office opposite the company building. | |  | Stative | Passive | The industrialist was despised by the angry and resentful client for refusing sternly to settle the potentially damaging lawsuit. | |  | Stative | Active | The industrialist despised the angry and resentful client for refusing sternly to settle the potentially damaging lawsuit. | | 20 | Eventive | Passive | The mechanic was hired by the skilled and friendly auto-electrician in the spacious garage next to the congested highway. | |  | Eventive | Active | The mechanic hired the skilled and friendly auto-electrician in the spacious garage next to the congested highway. | |  | Stative | Passive | The mechanic was trusted by the skilled and friendly auto-electrician for having helped to complete repairs on the car. | |  | Stative | Active | The mechanic trusted the skilled and friendly auto-electrician for having helped to complete repairs on the car. | | 21 | Eventive | Passive | The detective was pushed by the impulsive and panicky suspect in the dark interrogation room inside the police station. | |  | Eventive | Active | The detective pushed the impulsive and panicky suspect in the dark interrogation room inside the police station. | |  | Stative | Passive | The detective was feared by the impulsive and panicky suspect for having behaved very frighteningly during the last interrogation. | |  | Stative | Active | The detective feared the impulsive and panicky suspect for having behaved very frighteningly during the last interrogation. | | 22 | Eventive | Passive | The salesgirl was pushed by the nervous and overworked businesswoman in the shopping mall next to the tube station. | |  | Eventive | Active | The salesgirl pushed the nervous and overworked businesswoman in the shopping mall next to the tube station. | |  | Stative | Passive | The salesgirl was pitied by the nervous and overworked businesswoman for reacting hysterically in the famous haute couture boutique. | |  | Stative | Active | The salesgirl pitied the nervous and overworked businesswoman for reacting hysterically in the famous haute couture boutique. | | 23 | Eventive | Passive | The child was slapped by the young and skinny babysitter in the colourful nursery inside the big country-style house. | |  | Eventive | Active | The child slapped the young and skinny babysitter in the colourful nursery inside the big country-style house. | |  | Stative | Passive | The child was adored by the young and skinny babysitter for being very creative and imaginative in their games. | |  | Stative | Active | The child adored the young and skinny babysitter for being very creative and imaginative in their games. | | 24 | Eventive | Passive | The soldier was attacked by the armed and dangerous rebel in the dark tunnel next to the combat zone. | |  | Eventive | Active | The soldier attacked the armed and dangerous rebel in the dark tunnel next to the combat zone. | |  | Stative | Passive | The soldier was loathed by the armed and dangerous rebel for imprisoning women and children in the recent raids. | |  | Stative | Active | The soldier loathed the armed and dangerous rebel for imprisoning women and children in the recent raids. | | 25 | Eventive | Passive | The student was rescued by the aged and revered tutor near the collapsed basement inside the old humanities library. | |  | Eventive | Active | The student rescued the aged and revered tutor near the collapsed basement inside the old humanities library. | |  | Stative | Passive | The student was respected by the aged and revered tutor for making interesting observations about the Ancient Ottoman Empire. | |  | Stative | Active | The student respected the aged and revered tutor for making interesting observations about the Ancient Ottoman Empire. | | 26 | Eventive | Passive | The dancer was slapped by the oppressive and abusive choreographer in the messy dressing room of the renowned theatre. | |  | Eventive | Active | The dancer slapped the oppressive and abusive choreographer in the messy dressing room of the renowned theatre. | |  | Stative | Passive | The dancer was loathed by the oppressive and abusive choreographer for performing very badly during the show on Friday. | |  | Stative | Active | The dancer loathed the oppressive and abusive choreographer for performing very badly during the show on Friday. | | 27 | Eventive | Passive | The investigator was bribed by the unpleasant and bald bartender in the crowded pub next to the crime scene. | |  | Eventive | Active | The investigator bribed the unpleasant and bald bartender in the crowded pub next to the crime scene. | |  | Stative | Passive | The investigator was pitied by the unpleasant and bald bartender for making very racist jokes at the local pub. | |  | Stative | Active | The investigator pitied the unpleasant and bald bartender for making very racist jokes at the local pub. | | 28 | Eventive | Passive | The guide was saved by the handsome and athletic climber on the perilous track on the rugged mountain top. | |  | Eventive | Active | The guide saved the handsome and athletic climber on the perilous track on the rugged mountain top. | |  | Stative | Passive | The guide was envied by the handsome and athletic climber for reaching the top of the mountain without resting. | |  | Stative | Active | The guide envied the handsome and athletic climber for reaching the top of the mountain without resting. |  Appendix 10: Comprehension questions contained in Exp. 3 & 4.  | 1 | Eventive | Passive | Did the singer reject the guitarist? | | --- | --- | --- | --- | |  | Eventive | Active | Did the guitarist reject the singer? | |  | Stative | Passive | Did the singer cherish the guitarist? | |  | Stative | Active | Did the guitarist cherish the singer? | | 2 | Eventive | Passive | Did the chef pay the caterer? | |  | Eventive | Active | Did the caterer pay the chef? | |  | Stative | Passive | Did the chef admire the caterer? | |  | Stative | Active | Did the caterer admire the chef? | | 3 | Eventive | Passive | Did the apprentice injure the electrician? | |  | Eventive | Active | Did the electrician injure the apprentice? | |  | Stative | Passive | Did the apprentice resent the electrician? | |  | Stative | Active | Did the electrician resent the apprentice? | | 4 | Eventive | Passive | Did the witness harass the detective? | |  | Eventive | Active | Did the detective harass the witness? | |  | Stative | Passive | Did the witness hate the detective? | |  | Stative | Active | Did the detective hate the witness? | | 5 | Eventive | Passive | Did the artist sue the producer? | |  | Eventive | Active | Did the producer sue the artist? | |  | Stative | Passive | Did the artist detest the producer? | |  | Stative | Active | Did the producer detest the artist? | | 6 | Eventive | Passive | Did the waiter stab the chef? | |  | Eventive | Active | Did the chef stab the waiter? | |  | Stative | Passive | Did the waiter hate the chef? | |  | Stative | Active | Did the chef hate the waiter? | | 7 | Eventive | Passive | Did the spy abandon the soldier? | |  | Eventive | Active | Did the soldier abandon the spy? | |  | Stative | Passive | Did the spy fear the soldier? | |  | Stative | Active | Did the soldier fear the spy? | | 8 | Eventive | Passive | Did the politician injure the waitress? | |  | Eventive | Active | Did the waitress injure the politician? | |  | Stative | Passive | Did the politician love the waitress? | |  | Stative | Active | Did the waitress love the politician? | | 9 | Eventive | Passive | Did the professor harass the student? | |  | Eventive | Active | Did the student harass the professor? | |  | Stative | Passive | Did the professor cherish the student? | |  | Stative | Active | Did the student cherish the professor? | | 10 | Eventive | Passive | Did the actress reject the director? | |  | Eventive | Active | Did the director reject the actress? | |  | Stative | Passive | Did the actress adore the director? | |  | Stative | Active | Did the director adore the actress? | | 11 | Eventive | Passive | Did the steward stab the pilot? | |  | Eventive | Active | Did the pilot stab the steward? | |  | Stative | Passive | Did the steward resent the pilot? | |  | Stative | Active | Did the pilot resent the steward? | | 12 | Eventive | Passive | Did the sculptor abandon the photographer? | |  | Eventive | Active | Did the photographer abandon the sculptor? | |  | Stative | Passive | Did the sculptor admire the photographer? | |  | Stative | Active | Did the photographer admire the sculptor? | | 13 | Eventive | Passive | Did the protester attack the policeman? | |  | Eventive | Active | Did the policeman attack the protester? | |  | Stative | Passive | Did the protester detest the policeman? | |  | Stative | Active | Did the policeman detest the protester? | | 14 | Eventive | Passive | Did the nun save the teacher? | |  | Eventive | Active | Did the teacher save the nun? | |  | Stative | Passive | Did the nun value the teacher? | |  | Stative | Active | Did the teacher value the nun? | | 15 | Eventive | Passive | Did the doctor seduce the nurse? | |  | Eventive | Active | Did the nurse seduce the doctor? | |  | Stative | Passive | Did the doctor value the nurse? | |  | Stative | Active | Did the nurse value the doctor? | | 16 | Eventive | Passive | Did the reporter rescue the scientist? | |  | Eventive | Active | Did the scientist rescue the reporter? | |  | Stative | Passive | Did the reporter despise the scientist? | |  | Stative | Active | Did the scientist despise the reporter? | | 17 | Eventive | Passive | Did the model seduce the waitress? | |  | Eventive | Active | Did the waitress seduce the model? | |  | Stative | Passive | Did the model love the waitress? | |  | Stative | Active | Did the waitress love the model? | | 18 | Eventive | Passive | Did the pharmacist pay the babysitter? | |  | Eventive | Active | Did the babysitter pay the pharmacist? | |  | Stative | Passive | Did the pharmacist trust the babysitter? | |  | Stative | Active | Did the babysitter trust the pharmacist? | | 19 | Eventive | Passive | Did the industrialist sue the client? | |  | Eventive | Active | Did the client sue the industrialist? | |  | Stative | Passive | Did the industrialist despise the client? | |  | Stative | Active | Did the client despise the industrialist? | | 20 | Eventive | Passive | Did the mechanic hire the auto-electrician? | |  | Eventive | Active | Did the auto-electrician hire the mechanic? | |  | Stative | Passive | Did the mechanic trust the auto-electrician? | |  | Stative | Active | Did the auto-electrician trust the mechanic? | | 21 | Eventive | Passive | Did the detective push the suspect? | |  | Eventive | Active | Did the suspect push the detective? | |  | Stative | Passive | Did the detective fear the suspect? | |  | Stative | Active | Did the suspect fear the detective? | | 22 | Eventive | Passive | Did the businesswoman push the salesgirl? | |  | Eventive | Active | Did the salesgirl push the businesswoman? | |  | Stative | Passive | Did the businesswoman pity the salesgirl? | |  | Stative | Active | Did the salesgirl pity the businesswoman? | | 23 | Eventive | Passive | Did the child slap the babysitter? | |  | Eventive | Active | Did the babysitter slap the child? | |  | Stative | Passive | Did the child adore the babysitter? | |  | Stative | Active | Did the babysitter adore the child? | | 24 | Eventive | Passive | Did the soldier attack the rebel? | |  | Eventive | Active | Did the rebel attack the soldier? | |  | Stative | Passive | Did the soldier loath the rebel? | |  | Stative | Active | Did the rebel loath the soldier? | | 25 | Eventive | Passive | Did the student rescue the tutor? | |  | Eventive | Active | Did the tutor rescue the student? | |  | Stative | Passive | Did the student respect the tutor? | |  | Stative | Active | Did the tutor respect the student? | | 26 | Eventive | Passive | Did the dancer slap the choreographer? | |  | Eventive | Active | Did the choreographer slap the dancer? | |  | Stative | Passive | Did the dancer loath the choreographer? | |  | Stative | Active | Did the choreographer loath the dancer? | | 27 | Eventive | Passive | Did the investigator bribe the bartender? | |  | Eventive | Active | Did the bartender bribe the investigator? | |  | Stative | Passive | Did the investigator pity the bartender? | |  | Stative | Active | Did the bartender pity the investigator? | | 28 | Eventive | Passive | Did the climber save the guide? | |  | Eventive | Active | Did the guide save the climber? | |  | Stative | Passive | Did the climber envy the guide? | |  | Stative | Active | Did the guide envy the climber? | |
| --- | --- | --- | --- | --- | --- | --- | --- | --- | --- | --- | --- | --- | --- | --- | --- | --- | --- | --- | --- | --- | --- | --- | --- | --- | --- | --- | --- | --- | --- | --- | --- | --- | --- | --- | --- | --- | --- | --- | --- | --- | --- | --- | --- | --- | --- | --- | --- | --- | --- | --- | --- | --- | --- | --- | --- | --- | --- | --- | --- | --- | --- | --- | --- | --- | --- | --- | --- | --- | --- | --- | --- | --- | --- | --- | --- | --- | --- | --- | --- | --- | --- | --- | --- | --- | --- | --- | --- | --- | --- | --- | --- | --- | --- | --- | --- | --- | --- | --- | --- | --- | --- | --- | --- | --- | --- | --- | --- | --- | --- | --- | --- | --- | --- | --- | --- | --- | --- | --- | --- | --- | --- | --- | --- | --- | --- | --- | --- | --- | --- | --- | --- | --- | --- | --- | --- | --- | --- | --- | --- | --- | --- | --- | --- | --- | --- | --- | --- | --- | --- | --- | --- | --- | --- | --- | --- | --- | --- | --- | --- | --- | --- | --- | --- | --- | --- | --- | --- | --- | --- | --- | --- | --- | --- | --- | --- | --- | --- | --- | --- | --- | --- | --- | --- | --- | --- | --- | --- | --- | --- | --- | --- | --- | --- | --- | --- | --- | --- | --- | --- | --- | --- | --- | --- | --- | --- | --- | --- | --- | --- | --- | --- | --- | --- | --- | --- | --- | --- | --- | --- | --- | --- | --- | --- | --- | --- | --- | --- | --- | --- | --- | --- | --- | --- | --- | --- | --- | --- | --- | --- | --- | --- | --- | --- | --- | --- | --- | --- | --- | --- | --- | --- | --- | --- | --- | --- | --- | --- | --- | --- | --- | --- | --- | --- | --- | --- | --- | --- | --- | --- | --- | --- | --- | --- | --- | --- | --- | --- | --- | --- | --- | --- | --- | --- | --- | --- | --- | --- | --- | --- | --- | --- | --- | --- | --- | --- | --- | --- | --- | --- | --- | --- | --- | --- | --- | --- | --- | --- | --- | --- | --- | --- | --- | --- | --- | --- | --- | --- | --- | --- | --- | --- | --- | --- | --- | --- | --- | --- | --- | --- | --- | --- | --- | --- | --- | --- | --- | --- | --- | --- | --- | --- | --- | --- | --- | --- | --- | --- | --- | --- | --- | --- | --- | --- | --- | --- | --- | --- | --- | --- | --- | --- | --- | --- | --- | --- | --- | --- | --- | --- | --- | --- | --- | --- | --- | --- | --- | --- | --- | --- | --- | --- | --- | --- | --- | --- | --- | --- | --- | --- | --- | --- | --- | --- | --- | --- | --- | --- | --- | --- | --- | --- | --- | --- | --- | --- | --- | --- | --- | --- | --- | --- | --- | --- | --- | --- | --- | --- | --- | --- | --- | --- | --- | --- | --- | --- | --- | --- | --- | --- | --- | --- | --- | --- | --- | --- | --- | --- | --- | --- | --- | --- | --- | --- | --- | --- | --- | --- | --- | --- | --- | --- | --- | --- | --- | --- | --- | --- | --- | --- | --- | --- | --- | --- | --- | --- | --- | --- | --- | --- | --- | --- | --- | --- | --- | --- | --- | --- | --- | --- | --- | --- | --- | --- | --- | --- | --- | --- | --- | --- | --- | --- | --- | --- | --- | --- | --- | --- | --- | --- | --- | --- | --- | --- | --- | --- | --- | --- | --- | --- | --- | --- | --- | --- | --- | --- | --- | --- | --- | --- | --- | --- | --- | --- | --- | --- | --- | --- | --- | --- | --- | --- | --- | --- | --- | --- | --- | --- | --- | --- | --- | --- | --- | --- | --- | --- | --- | --- | --- | --- | --- | --- | --- | --- | --- | --- | --- | --- | --- | --- | --- | --- | --- | --- | --- | --- | --- | --- | --- | --- | --- | --- | --- | --- | --- | --- | --- | --- | --- | --- | --- | --- | --- | --- | --- | --- | --- | --- | --- | --- | --- | --- | --- | --- | --- | --- | --- | --- | --- | --- | --- | --- | --- | --- | --- | --- | --- | --- | --- | --- | --- | --- | --- | --- | --- | --- | --- | --- | --- | --- | --- | --- | --- | --- | --- | --- | --- | --- | --- | --- | --- | --- | --- | --- | --- | --- | --- | --- | --- | --- | --- | --- | --- | --- | --- | --- | --- | --- | --- | --- | --- | --- | --- | --- | --- | --- | --- | --- | --- | --- | --- | --- | --- | --- | --- | --- | --- | --- | --- | --- | --- | --- | --- | --- | --- | --- | --- | --- | --- | --- | --- | --- | --- | --- | --- | --- | --- | --- | --- | --- | --- | --- | --- | --- | --- | --- | --- | --- | --- | --- | --- | --- | --- | --- | --- | --- | --- | --- | --- | --- | --- | --- | --- | --- | --- | --- | --- | --- | --- | --- | --- | --- | --- | --- | --- | --- | --- | --- | --- | --- | --- | --- | --- | --- | --- | --- | --- | --- | --- | --- | --- | --- | --- | --- | --- | --- | --- | --- | --- | --- | --- | --- | --- | --- | --- | --- | --- | --- | --- | --- | --- | --- | --- | --- | --- | --- | --- | --- | --- | --- | --- | --- | --- | --- | --- | --- | --- | --- | --- | --- | --- | --- | --- | --- | --- | --- | --- | --- | --- | --- | --- | --- | --- | --- | --- | --- | --- | --- | --- | --- | --- | --- | --- | --- | --- | --- | --- | --- | --- | --- | --- | --- | --- | --- | --- | --- | --- | --- | --- | --- | --- | --- | --- | --- | --- | --- | --- | --- | --- | --- | --- | --- | --- | --- | --- | --- | --- | --- | --- | --- | --- | --- | --- | --- | --- | --- | --- | --- | --- | --- | --- | --- | --- | --- | --- | --- | --- | --- | --- | --- | --- | --- | --- | --- | --- | --- | --- | --- | --- | --- | --- | --- | --- | --- | --- | --- | --- | --- | --- | --- | --- | --- | --- | --- | --- | --- | --- | --- | --- | --- | --- | --- | --- | --- | --- | --- | --- |
